# Supplementary material for: In situ growth of CoP nanoparticles anchored on (N,P) co-doped porous carbon engineered by MOFs as advanced bifunctional oxygen catalyst for rechargeable Zn–air battery
Source: Royal Society of Chemistry journal article supplement (doi:10.1039/d0ta06435a), 2020-01-01
Supplement: d0ta06435a1.pdf [file d0ta06435a1.pdf]

**In-situ growth of CoP nanoparticles anchored on (N, P) co-doped porous carbon  
engineered by MOFs as advanced bifunctional oxygen catalyst for rechargeable  
Zn-air battery**

Yongxia Wang,<sup>a</sup> Mingjie Wu,<sup>c</sup> Jun Li,<sup>a</sup> Haitao Huang<sup>d</sup> and Jinli Qiao<sup>\*a, b</sup>

<sup>a</sup>State Key Laboratory for Modification of Chemical Fibers and Polymer Materials, College of Environmental Science and Engineering, Donghua University, 2999 Ren'min North Road, Shanghai 201620, China.

<sup>b</sup>Shanghai Institute of Pollution Control and Ecological Security, 1515 North Zhongshan Road, Shanghai 200092, China.

<sup>c</sup>Institut National de la Recherche Scientifique-Énergie Matériaux et Télécommunications, Varennes, Québec J3X 1S2, Canada.

<sup>d</sup>Department of Applied Physics, Hong Kong Polytechnic University, 11 yucaï road, Kowloon, Hongkong, China.

\*Corresponding author: Tel: +86 21 67792379. Fax: +86 21 67792159; Email: [qiaojl@dhu.edu.cn](mailto:qiaojl@dhu.edu.cn)(JLQ)



Fig. S1 TEM morphology of the ZnCo-MOF (a) and the Co/N-HPC (b).



Fig. S2 The HRTEM morphology of the CoP/NP-HPC and the lattice spacing of CoP particles.



Fig. S3 Tafel plots of the catalysts for ORR



Fig. S4 The overall oxygen electrode activity of CoP/NP-HPC for ORR and OER before and after 3000 cycles.



Fig. S5 The discharge/charge cycling curves of rechargeable Zn-air batteries at  $5 \text{ mA cm}^{-2}$ .



Fig. S6 The XRD spectra of the CoP/NP-HPC after 7 h charge-discharge process.



Fig. S7 The TEM morphology of the CoP/NP-HPC after 7 h charge-discharge process.

Table S1 Surface area and pore size of the obtained Co/N-HPC and CoP/NP-HPC.

| Sample     | Surface area<br>( $\text{m}^2 \text{g}^{-1}$ ) | Pore size<br>(nm) | Pore volume<br>( $\text{cm}^3 \text{g}^{-1}$ ) |
|------------|------------------------------------------------|-------------------|------------------------------------------------|
| Co/N-NPC   | 369                                            | 8.1               | 0.51                                           |
| CoP/NP-NPC | 323                                            | 10.9              | 0.53                                           |

Table S2 Catalytic activity of Co based phosphides for ORR in 0.1M KOH solution.

| Sample                      | $E_{\text{onset}}$ (V) | $E_{1/2}$ (V) | Ref.         |
|-----------------------------|------------------------|---------------|--------------|
| CoP/NP-HPC                  | 0.95                   | 0.83          | In this work |
| Co <sub>2</sub> P-40        | 0.80                   | -             | 1            |
| NC-CoP                      | 0.82                   | -             | 2            |
| In-CoO/CoP FNS              | 0.94                   | 0.81          | 3            |
| Bi-CoP/NP-DG                | 0.93                   | 0.81          | 4            |
| NC@CoP <sub>x</sub> /PyCNTs | 0.92                   | 0.80          | 5            |
| Fe <sub>0.33</sub> -CoP/NF  | 0.90                   | 0.80          | 6            |
| CoP@SNC                     | 0.87                   | 0.79          | 7            |
| CoP-DC                      | 0.91                   | 0.81          | 8            |
| Co <sub>2</sub> P@NPC       | -                      | 0.82          | 9            |
| CoP NCs                     | 0.92                   | -             | 10           |
| Co <sub>2</sub> P           | 0.87                   | 0.78          | 11           |
| Co/CoP-HNC                  | 0.94                   | 0.83          | 12           |
| HCNT-Co <sub>2</sub> P      | 0.86                   | 0.79          | 13           |
| Co <sub>2</sub> P@CoNPG     | 0.90                   | 0.81          | 14           |
| FexP/NPCS                   | 0.92                   | 0.83          | 15           |
| Co-NC@CoP-NC                | 0.89                   | 0.79          | 16           |
| CoNP@NC/NG                  | 0.93                   | -             | 17           |
| CoP                         | 0.80                   | 0.70          | 18           |
| Co <sub>x</sub> P-CNTs-1000 | 0.86                   | 0.78          | 19           |

1. A. Parra-Puerto, K. L. Ng, K. Fahy, A. E. Goode, M. P. Ryan and A. Kucernak, *ACS Catal.*, 2019, **9**, 11515-11529.
2. M. M. Kumar and C. R. Raj, *ACS Appl. Nano Mater.*, 2019, **2**, 643-648.
3. W. Jin, J. Chen, B. Liu, J. Hu, Z. Wu, W. Cai and G. Fu, *Small*, 2019, **15**, e1904210.
4. J. Chen, B. Ni, J. Hu, Z. Wu and W. Jin, *J. Mater. Chem. A*, 2019, **7**, 22507-22513.
5. Q. Wang, Y. Fan, K. Wang, H. Shen, G. Li, H. Fu and Y. She, *Carbon*, 2018, **130**, 241-249.
6. X. Qin, Z. Wang, J. Han, Y. Luo, F. Xie, G. Cui, X. Guo and X. Sun, *Chem. Commun.*, 2018, **54**, 7693-7696.

7. T. Meng, Y. N. Hao, L. Zheng and M. Cao, *Nanoscale*, 2018, **10**, 14613-14626.
8. Y. Lin, L. Yang, Y. Zhang, H. Jiang, Z. Xiao, C. Wu, G. Zhang, J. Jiang and L. Song, *Adv. Energy Mater.*, 2018, **8**, 1703623.
9. J. Li, G. Liu, B. Liu, Z. Min, D. Qian, J. Jiang and J. Li, *Int. J. Hydrogen Energ.*, 2018, **43**, 1365-1374.
10. H. Li, Q. Li, P. Wen, T. B. Williams, S. Adhikari, C. Dun, C. Lu, D. Itanze, L. Jiang, D. L. Carroll, G. L. Donati, P. M. Lundin, Y. Qiu and S. M. Geyer, *Adv. Mater.*, 2018, **30**, 1705796.
11. V. V. T. Doannnguyen, S. Zhang, E. B. Trigg, R. Agarwal, J. Li, D. Su, K. I. Winey and C. B. Murray, *ACS Nano*, 2015, **9**, 8108-8115.
12. Y. Hao, Y. Xu, W. Liu and X. Sun, *Mater. Horiz.*, 2018, **5**, 108-115.
13. K. Chen, X. Huang, C. Wan and H. Liu, *RSC Adv.*, 2015, **5**, 92893-92898.
14. H. Jiang, C. Li, H. Shen, Y. Liu, W. Li and J. Li, *Electrochim. Acta*, 2017, **231**, 344-353.
15. K. Hu, Z. Xiao, Y. Cheng, D. Yan, R. Chen, J. Huo and S. Wang, *Electrochim. Acta*, 2017, **254**, 280-286.
16. X. Li, Q. Jiang, S. Dou, L. Deng, J. Huo and S. Wang, *J. Mater. Chem. A*, 2016, **4**, 15836-15840.
17. X. Zhong, Y. Jiang, X. Chen, L. Wang, G. Zhuang, X. Li and J.-g. Wang, *J. Mater. Chem. A*, 2016, **4**, 10575-10584.
18. H. Yang, Y. Zhang, F. Hu and Q. Wang, *Nano lett.*, 2015, **15**, 7616-7620.
19. K. Chen, X. Huang, C. Wan and H. Liu, *Chem. Commun.*, 2015, **51**, 7891-7894.
